# Supplementary material for: Antibiotic dispensing practices and determinants among informal healthcare providers in low- and middle-income countries: a mixed-methods scoping review
Source: Research Square preprint supplement (doi:10.21203/rs.3.rs-8123464/v1), 2025-11-26
Supplement: Supplementary file 1 [file 7718b333f09a4ab1bd38ba44.docx]

# Table 1: Study-specific definitions of IPs (Research aims 1 & 2)

| **Author (Year)** | **Study title** | **Study Aim** | **Country** | **Term used to indicate IPs** | **Definition Used for IPS (Exactly as reported or the adapted version)** |
| --- | --- | --- | --- | --- | --- |
| Okonofua et al (1999) | Assessment of health services for treatment of sexually transmitted infections among Nigerian adolescents | To investigate the quality of services provided by formal and informal treatment channels for STDs among adolescents in Benin City, Nigeria. | Nigeria | Informal sector health providers | Defined as those who are not part of the formal healthcare system and have no specific professional certificates. The patent medicine dealers often operated in one room, with the drugs displayed on shelves. Most traditional healers operated their clinics from home, except for one who ran a formal traditional medicine clinic. |
| Somse et al (2000) | Quality of sexually transmitted disease treatments in the formal and informal sectors of Bangui, Central African Republic | To compare the quality of treatments offered to patients with major STD syndromes in the public sector, phar­macies, and the informal sector of the same city. | Central African Republic | Boubanguere | Defined as boubanguere, who are drug peddlers. Mainly operating in markets or on commercial streets, without the benefit of a fixed building and without formal health training. |
| Asante (2021) | Medicine Sales by Itinerant Vendors at Lorry Stations – A Case Study at Kejetia Station in Kumasi, Ghana | The objectives of the study were to determine the sources and classes of drugs sold by these vendors, their existing storage conditions, and the reasons why people patronise their services instead of visiting a health facility when unwell. | Ghana | Itinerant Vendors | Defined as itinerant vendors of medicine who were actively selling their products with no formal training in pharmacy or little knowledge on drugs. |
| Patnaik et al (2007) | Treatment practices for lymphatic filariasis amongst doctors of East Godavari District, Andhra Pradesh | To understand the treatment practices prevalent amongst qualified and non-qualified medical practitioners. | India | Unqualified medical practitioners, such as RMP (Registered Medical Practitioners), PMP (Private Medical Practitioners), BMP (Basic Medical Practitioners) | Defined as unqualified (non-MBBS) private practitioners who treat patients using the allopathic system of medicine. |
| Ndoutamia et al (2017) | Perception, knowledge and use of antibiotics among communities in Chad | To assess the abusive and inappropriate use of antibiotics among the communities. | Chad | Unqualified street vendors. | No definition provided |
| Adamu et al (2020) | Factors influencing non-prescription sales of antibiotics among patent and proprietary medicine vendors in Kano, Nigeria: a cross-sectional study | To elicit the determinants of non-prescription antibiotic sales among PPMVs in Kano metropolis, Nigeria. | Nigeria | Patent and proprietary medicine vendors (PPMVs) | Defined as a person who does not possess a pharmacy qualification but engages in the sale of over-the-counter drugs |
| Gautham et al (2014) | Informal rural healthcare providers in North and South India | To map and characterize IPs in two different rural settings in the north and south of India. | India | Private informal biomedical providers (IPs) | Defined as providers who lack valid medical qualifications |
| Amponsah et al (2005) | Alternative eye care service in Ghanaian district | To determine eye care services sought outside the regular hospital system and their providers. | Ghana | Chemical shop attendants | Defined as those who operate outside the regular hospital and clinic system. |
| Mamun et al (2007) | A survey of antimicrobial prescribing and dispensing practices in rural Bangladesh | To determine the patterns of antimicrobial prescription by Rural Medical Practitioners in Bangladesh | Bangladesh | Rural Medical Practitioners (RMPs) | Defined as those who are usually trained to treat some common diseases/ conditions and are allowed to prescribe a few basic drugs but are not authorized to prescribe any form of antibiotics. |
| Qidwai et al (2006) | Private drug sellers’ education in improving prescribing practices | To determine the education of private drug sellers as an intervention tool in promoting rational use of medicines for diarrhoea at private drug outlets in a rural setting | Pakistan | Private drug sellers | Defined as private drug sellers who prescribe and dispense medications without formal qualifications (such as a pharmacy graduate) as required by law, and often with limited or no knowledge in prescribing medications. |
| Samal et al (2019) | Treatment by untrained providers among sick infants in rural Odisha, India | This study assessed the diagnosis, treatment and referral service provided by untrained providers for sick infants | India | Untrained providers | Defined as providers who deliver healthcare without any specific medical training. They are not registered with any government regulatory body and operate outside the regulatory framework. They are often referred to as informal health-care providers, non-formal providers, unlicensed providers, traditional healers, village doctors, and 'quacks'. |
| Lucas et al (2019) | Pathways to antibiotics in Bangladesh: A qualitative study investigating how and when households access medicine, including antibiotics for humans or animals when they are ill | To explore how households in Bangladesh were accessing antimicrobials for themselves and their domestic animals | Bangladesh | Drug shops | Defined as unregulated vendors who sell allopathic medicines, regardless of whether they are licensed. People often referred to drug sellers and drug shop owners as ‘doctors’ although they are unqualified and may have simply inherited the business. Some refer to them as “small doctors” or “village doctors”, differentiating them from “big doctors” or “MBBS [Bachelor of Medicine, Bachelor of Surgery] doctors”. |
| Sizear et al (2019) | Perceptions of appropriate treatment among the informal allopathic providers: insights from a qualitative study in two peri-urban areas in Bangladesh | To explore the current practice of informal providers and to understand their perception of appropriate care and use of medicine | Bangladesh | Informal allopathic providers | Defined as those who engage in health activities without possessing official qualifications or permits. They are not registered with any government regulatory body and operate beyond government oversight. Generally, they do not receive training from recognized medical institutions but learn through workshops, seminars, and apprenticeships. |
| Thapa et al (2022) | What are the tuberculosis care practices of informal healthcare providers? A cross-sectional study from Eastern India | To document IPs’ TB care practices, primarily focusing on their approach to screening, diagnosis, treatment, and referral of presumptuous TB cases. | India | Informal healthcare providers (IPs) | Defined as providers who are not trained but prescribe allopathic medicine (as reported by them) as part of their regular practice. |
| Nair et al (2019) | Knowledge, attitudes, and practices related to antibiotic use in Paschim Bardhaman District: A survey of healthcare providers in West Bengal, India | To systematically examine the knowledge, attitudes, and practices of informal and formal providers with respect to antibiotic use. | India | Informal health providers (IHPs) | Defined as providers who do not hold formal medical degrees and are untrained in allopathic medicine, disburse antibiotics as part of their regular practice |
| Om et al (2017) | Pervasive antibiotic misuse in the Cambodian community: antibiotic-seeking behaviour with unrestricted access | To explore healthcare-seeking behaviour related to obtaining antibiotics and drivers of antibiotic misuse in the Cambodian community. | Cambodia | Unofficial village medical providers referred to as “village Pett” | Defined as individuals with non-university, field-based healthcare training, often from historical contexts like the Khmer Rouge period or border camps. They provide community healthcare, including antibiotics, without formal qualifications. |
| Islam et al (2014) | Informal allopathic provider knowledge and practice regarding control and prevention of TB in rural Bangladesh | To explore the knowledge and practices of the providers in the control and prevention of TB. | Bangladesh | Informal allopathic providers | Defined as individuals without formal medical training who offer health services, often through drug dispensing and symptomatic treatment. Common in rural areas, they are accessible, affordable, and frequently involved in the irrational use of antibiotics. |
| Samir et al (2021) | Antibiotic Use for Febrile Illness among Under-5 Children in Bangladesh: A Nationally Representative Sample Survey | To explore the prevalence of, and factors associated with, antibiotic use in children under five years old with febrile illness in Bangladesh. | Bangladesh | Unqualified providers | Defined as non-qualified providers who supply antibiotics to a large proportion of the population, often in incorrect doses. |
| Bepari et al (2023) | Factors Driving Antimicrobial Resistance in Rural Bangladesh: A Cross-Sectional Study on Antibiotic Use-Related Knowledge, Attitude, and Practice Among Unqualified Village Medical Practitioners and Pharmacy Shopkeepers | To identify AMR contributing factors by analysing the knowledge, attitude, and practice (KAP) of the unqualified village medical practitioners and pharmacy shopkeepers in rural Bangladesh. | Bangladesh | Unqualified village medical practitioners | Defined as providers who are not legally eligible to prescribe antibiotics and not permitted to use the title ‘‘Doctor’’ or ‘‘Dr.’’ according to the existing Bangladeshi law. |
| Gautham et al (2021) | What are the challenges for antibiotic stewardship at the community level? An analysis of the drivers of antibiotic provision by informal healthcare providers in rural India | To analyze the intrinsic and extrinsic drivers of IPs’ antibiotic provision in rural West Bengal. | India | Informal healthcare providers | Defined as rural medical practitioners who provide consultation services in small ‘clinics’ and dispense and/or prescribe allopathic medicines. |
| Saha et al (2017) | Evaluation of medicine dispensing pattern of private pharmacies in Rajshahi, Bangladesh | To investigate the medicine dispensing patterns of the pharmacies in Rajshahi, Bangladesh and to identify and analyse the contribution of drug sellers and quacks in irrational drug use. | Bangladesh | Quacks | Defined as a person unauthorised to practice medicine. |
| Gautham et al (2022) | Availability, Prices and Affordability of Antibiotics Stocked by Informal Providers in Rural India: A Cross-Sectional Survey | To assess the availability and sales of the antibiotics that were stocked in IP clinics, their retail prices, their mark-ups for IPs, and their affordability. | India | Informal providers (IPs) | Defined as providers who did not possess a formal medical degree or diploma, and who provided consultation services and dispensed/prescribed allopathic (biomedical) drugs. |
| Uneke et al (2021) | An assessment of nursing mothers’ and young people’s access to proprietary and patent medicine vendors’ services in rural communities of south-eastern Nigeria: implication for review of national drug policy | To determine how PPMVs influence access to medicines among nursing mothers and young people and how this progresses Southeastern Nigeria towards universal health coverage. | Nigeria | Proprietary and patent medicine vendors (PPMVs) | Defined as individuals who have not received formal training in pharmacy but are authorised to sell orthodox pharmaceutical products on a retail basis for profit. |
| Khare et al (2021) | Determinants and pathways of healthcare-seeking behaviours in under-5 children for common childhood illnesses and antibiotic prescribing: a cohort study in rural India | To explore the healthcare-seeking pathways, antibiotic prescribing, and determine the sociodemographic factors associated with healthcare-seeking behaviour (HSB) of caregivers for common illnesses in under-5 (U-5) children in rural Ujjain, India. | India | Informal healthcare providers (IHCPs) | Defined as providers who have not received a formal degree in medicine from any institution and who are not registered as healthcare practitioners by any governing body, these include informal private practitioners, local unlicensed pharmaceutical vendors, and traditional healers. |
| Khare et al (2019) | Antibiotic Prescribing by Informal Healthcare Providers for Common Illnesses: A Repeated Cross-Sectional Study in Rural India | To determine the practices and seasonal changes in antibiotic prescribing for common illnesses by IHCPs. | India | Informal healthcare providers (IHCPs) | Defined as healthcare providers who have not received a formal degree in medicine from any institution and are not registered as healthcare practitioners with any governing body. While some may have received some informal training, they are not certified by any formal institute |
| Onah et al (2021) | Practices toward Presumptive Tuberculosis Clients among Patent Medicine Vendors in Ebonyi State, Nigeria | To describe the practices of patent medicine vendors (PMVs) toward presumptive tuberculosis (TB) clients and assess the determinants of these practices in Ebonyi State, Nigeria. | Nigeria | Patent Medicine Vendors (PMVs) | Defined as informal private providers who are often the first point of contact for people with TB symptoms. They commonly engage in unregulated practices, including selling unstandardized anti-TB medicines and treating TB cases without formal training. |
| Sujon et al (2023) | Beyond the regulatory radar: knowledge and practices of rural medical practitioners in Bangladesh | To evaluate the practice pattern of RMPs in handling three common diseases encountered by them viz. common cold, pneumonia and diarrhoea, and their associated factors using data collected from the entire country. | Bangladesh | Rural medical practitioners (RMPs) | Defined as providers who practice modern medicine, without any recognized training, or with recognized training, but practising outside their defined roles without any regulatory oversight. |

# Table 2: Study-specific definitions of IPs (Research aim 3)

| **Author (Year)** | **Study title** | **Study Aim** | **Country** | **Term used to indicate IPs** | **Definition Used for IPS (Exactly as reported or the adapted version)** |
| --- | --- | --- | --- | --- | --- |
| Nair et al (2019) | Knowledge, attitudes, and practices related to antibiotic use in Paschim Bardhaman District: A survey of healthcare providers in West Bengal, India | To systematically examine the knowledge, attitudes, and practices of informal and formal providers with respect to antibiotic use. | India | Informal health providers (IHPs) | Defined as providers who do not hold formal medical degrees and are untrained in allopathic medicine, they disburse antibiotics as part of their regular practice |
| Sizear et al (2019) | Perceptions of appropriate treatment among the informal allopathic providers: insights from a qualitative study in two peri-urban areas in Bangladesh | To explore the current practice of informal providers and to understand their perception of appropriate care and use of medicine | Bangladesh | Informal allopathic providers | Defined as those who engage in health activities without possessing official qualifications or permits. They are not registered with any government regulatory body and operate beyond government oversight. Generally, they do not receive training from recognized medical institutions but learn through workshops, seminars, and apprenticeships. |
| Khare et al (2022) | Understanding Internal and External Drivers Influencing the Prescribing Behaviour of Informal Healthcare Providers with Emphasis on Antibiotics in Rural India: A Qualitative Study | To analyse the internal and external drivers that influence IHCPs' prescribing behaviour for common illnesses in under-five (U-5) children, with an emphasis on antibiotic use, in rural areas of India. | India | Informal healthcare providers (IHCPs) | Defined as healthcare professionals who have not acquired a formal medical degree from an institution recognised by the Medical Council of India and who are not registered with regulatory body, the Medical Council of India/State Medical Council(s) as healthcare practitioners |
| Suy et al (2019) | Invisible medicine sellers and their use of antibiotics: a qualitative study in Cambodia | To investigate factors that influence community decisions on which HCPs to purchase medicines from, focusing on reasons for using Invisible Medicine Sellers (IMS). | Cambodia | Invisible Medicine Sellers (IMS) | Defined as those who provide health services without having a marked and specifically designated outlet for this purpose and are part of the broader category of informal providers. |
| Gautham et al (2021) | What are the challenges for antibiotic stewardship at the community level? An analysis of the drivers of antibiotic provision by informal healthcare providers in rural India | To analyse the intrinsic and extrinsic drivers of IPs’ antibiotic provision in rural West Bengal. | India | Informal healthcare providers | Defined as rural medical practitioners who provide consultation services in small ‘clinics’ and dispense and/or prescribe allopathic medicines. |
| Nahar et al (2020) | What contributes to inappropriate antibiotic dispensing among qualified and unqualified healthcare providers in Bangladesh? A qualitative study | To explore understandings of the use and functions of antibiotics, awareness of AMR, and perceived patient or customer demand and adherence among HCPs for human and animal medicine in Bangladesh. | Bangladesh | Unqualified providers | Defined as those without any health-related training, who sell medicines, assist the shopkeeper or provide prescriptions (verbal or written) for humans or animals. |
