# Supplementary material for: Antibiotic dispensing practices and determinants among informal healthcare providers in low- and middle-income countries: a mixed-methods scoping review
Source: Research Square preprint supplement (doi:10.21203/rs.3.rs-8123464/v1), 2025-11-26
Supplement: Supplementary file 3 [file f32a0d83cdb4dc453775ad83.docx]

Supplementary File (S2)

| Platform | Database(s) | Database coverage dates | # Results | Search Date | Remarks |
| --- | --- | --- | --- | --- | --- |
| OvidSP | Ovid MEDLINE ALL(R) | 1946 - | 1460 | June 11, 2024 |  |
| OvidSP | EMBASE Classic + EMBASE | 1947 - | 2016 | June 11, 2024 |  |
| Scopus | Scopus | Inception - | 2722 | June 11, 2024 |  |
| Web of Science | SCI, ISTP, BSCI, ESCI | 1900 - | 1613 | June 11, 2024 |  |
| OvidSP | Global Health, Global Health Archive | 1910 - | 1579 | June 11, 2024 |  |
| EBSCOhost | CINAHL | Inception - | 346 | June 11, 2024 |  |
| Global Index Medicus | LILACS | Inception - | 198 | June 11, 2024 |  |
| Global Index Medicus | IMSEAR | Inception - | 98 | June 11, 2024 |  |
| EBSCOhost | Africa-Wide Information | Inception - | 77 | June 11, 2024 | Limited to African Journals Online |
|  | **TOTAL NUMBER OF RECORDS** |  | 10109 |  |  |

## Ovid MEDLINE ALL (Ovid)

| Ovid MEDLINE(R) ALL <1946 to June 10, 2024> | | |
| --- | --- | --- |
| 1 | Community Health Workers/ or Quackery/ or (Informal* or Semi-qualified or semiqualified or un-qualified or unqualified or un-trained or Untrained or Non-formal* or "Less than fully qualified" or ((Alternative or folk or traditional) adj2 (practitioner* or provider* or therapist* or worker*)) or Patent medicine vendor* or quack* or Compounder* or (Rural adj3 (practitioner* or provider*)) or detailer* or ((local or non-graduate or private or non-registered) adj (health* or medical) adj2 (practitioner* or provider*)) or (Drug adj (seller* or vendor* or wholesaler*)) or Shopkeeper* or "shop keeper*" or Hakeem* or ((alternative or faith or folk or natural or spiritual or traditional) adj2 Healer*) or ((barefoot or Village) adj (aide* or doctor* or health worker* or volunteer*)) or Individual practitioner* or (lay adj (practitioner* or provider* or worker*)) or non physician* or nonphysician* or ("complementary and alternative" adj2 (practitioner* or provider*)) or herbalist* or birth* attendant* or (community health adj (aide* or educator* or worker*)) or community based practitioner* or (indigenous adj (healer* or provider* or practitioner*)) or non-state actor* or (ayurved* adj2 (sector* or worker*))).mp. or (((alternative or folk or traditional) adj medicine) or healer*).ti. | 87080 |
| 2 | Anti-Infective Agents/ or exp Anti-Bacterial Agents/ | 876890 |
| 3 | (anti bacterial* or antibacterial* or antibiotic* or anti infecti* or antiinfecti* or antimicrobial* or anti microbial*).ti,ab,kf. | 700586 |
| 4 | 2 or 3 | 1211949 |
| 5 | 1 and 4 | 1460 |

## Embase Classic+Embase (Ovid)

| Embase Classic+Embase <1947 to 2024 June 10> | | |
| --- | --- | --- |
| 1 | *health auxiliary/ or *quackery/ or (Informal* or Semi-qualified or semiqualified or un-qualified or unqualified or un-trained or Untrained or Non-formal* or "Less than fully qualified" or ((Alternative or folk or traditional) adj2 (practitioner* or provider* or therapist* or worker*)) or Patent medicine vendor* or quack* or Compounder* or (Rural adj3 (practitioner* or provider*)) or detailer* or ((local or non-graduate or private or non-registered) adj (health* or medical) adj2 (practitioner* or provider*)) or (Drug adj (seller* or vendor* or wholesaler*)) or Shopkeeper* or "shop keeper*" or Hakeem* or ((alternative or faith or folk or natural or spiritual or traditional) adj2 Healer*) or ((barefoot or Village) adj (aide* or doctor* or health worker* or volunteer*)) or Individual practitioner* or (lay adj (practitioner* or provider* or worker*)) or non physician* or nonphysician* or ("complementary and alternative" adj2 (practitioner* or provider*)) or herbalist* or birth* attendant* or (community health adj (aide* or educator* or worker*)) or community based practitioner* or (indigenous adj (healer* or provider* or practitioner*)) or non-state actor* or (ayurved* adj2 (sector* or worker*))).mp. or (((alternative or folk or traditional) adj medicine) or healer*).ti. | 102605 |
| 2 | *antiinfective agent/ or antibiotic agent/ or exp *antibiotic agent/ | 1115377 |
| 3 | (anti bacterial* or antibacterial* or antibiotic* or anti infecti* or antiinfecti* or antimicrobial* or anti microbial*).ti,ab,kf. | 955430 |
| 4 | 2 or 3 | 1588497 |
| 5 | 1 and 4 | 2016 |

## Scopus

(TITLE-ABS("Informal*") OR TITLE-ABS("Semi-qualified") OR TITLE-ABS("semiqualified") OR TITLE-ABS("un-qualified") OR TITLE-ABS("unqualified") OR TITLE-ABS("un-trained") OR TITLE-ABS("Untrained") OR TITLE-ABS("Non-formal") OR TITLE-ABS("Less than fully qualified") OR ((TITLE-ABS("Alternative") OR TITLE-ABS("folk") OR TITLE-ABS("traditional")) W/2 (TITLE-ABS("practitioner*") OR TITLE-ABS("provider*") OR TITLE-ABS("therapist*") OR TITLE-ABS("worker*"))) OR TITLE-ABS("Patent medicine vendor*") OR TITLE-ABS("quack*") OR TITLE-ABS("Compounder*") OR (TITLE-ABS("Rural") W/3 (TITLE-ABS("practitioner*") OR TITLE-ABS("provider*"))) OR TITLE-ABS("detailer*") OR ((TITLE-ABS("local") OR TITLE-ABS("non-graduate") OR TITLE-ABS("private") OR TITLE-ABS("non-registered")) W/1 (TITLE-ABS("health*") OR TITLE-ABS("medical")) W/2 (TITLE-ABS("practitioner*") OR TITLE-ABS("provider*"))) OR (TITLE-ABS("Drug") W/1 (TITLE-ABS("seller*") OR TITLE-ABS("vendor*") OR TITLE-ABS("wholesaler*"))) OR TITLE-ABS("Shopkeeper*") OR TITLE-ABS("shop keeper*") OR TITLE-ABS("Hakeem*") OR ((TITLE-ABS("alternative") OR TITLE-ABS("faith") OR TITLE-ABS("folk") OR TITLE-ABS("natural") OR TITLE-ABS("spiritual") OR TITLE-ABS("traditional")) W/2 TITLE-ABS("Healer*")) OR ((TITLE-ABS("barefoot") OR TITLE-ABS("Village")) W/1 (TITLE-ABS("aide*") OR TITLE-ABS("doctor*") OR TITLE-ABS("health worker*") OR TITLE-ABS("volunteer*"))) OR TITLE-ABS("Individual practitioner*") OR (TITLE-ABS("lay") W/1 (TITLE-ABS("practitioner*") OR TITLE-ABS("provider*") OR TITLE-ABS("worker*"))) OR TITLE-ABS("non physician*") OR TITLE-ABS("nonphysician*") OR (TITLE-ABS("complementary and alternative") W/2 (TITLE-ABS("practitioner*") OR TITLE-ABS("provider*"))) OR TITLE-ABS("herbalist*") OR TITLE-ABS("birth* attendant*") OR (TITLE-ABS("community health") W/1 (TITLE-ABS("aide*") OR TITLE-ABS("educator*") OR TITLE-ABS("worker*"))) OR TITLE-ABS("community based practitioner*") OR (TITLE-ABS("indigenous") W/1 (TITLE-ABS("healer*") OR TITLE-ABS("provider*") OR TITLE-ABS("practitioner*"))) OR TITLE-ABS("non-state actor*") OR (TITLE-ABS("ayurved*") W/2 (TITLE-ABS("sector*") OR TITLE-ABS("worker*")))) OR (((TITLE("alternative") OR TITLE("folk") OR TITLE("traditional")) W/1 TITLE("medicine")) OR TITLE("healer*"))

AND

TITLE-ABS("anti bacterial*" OR antibacterial* OR antibiotic* OR "anti infecti*" OR antiinfecti* OR "anti microbial*" OR antimicrobial*)

## Web of Science Core Collection (WOS.SCI,WOS.ISTP,WOS.BSCI,WOS.ESCI)

# Web of Science Search Strategy (v0.1)

# Database: Web of Science Core Collection

# Entitlements:

- WOS.IC: 1993 to 2024

- WOS.CCR: 1985 to 2024

- WOS.SCI: 1900 to 2024

- WOS.AHCI: 1975 to 2024

- WOS.BHCI: 2005 to 2024

- WOS.BSCI: 2005 to 2024

- WOS.ESCI: 2005 to 2024

- WOS.ISTP: 1990 to 2024

- WOS.SSCI: 1900 to 2024

- WOS.ISSHP: 1990 to 2024

# Searches:

Search: (TS=(Informal* OR Semi-qualified OR semiqualified OR un-qualified OR unqualified OR un-trained OR Untrained OR Non-formal* OR "Less than fully qualified" OR ((Alternative OR folk OR traditional) NEAR/2 (practitioner* OR provider* OR therapist* OR worker*)) OR "Patent medicine vendor*" OR quack* OR Compounder* OR (Rural NEAR/3 (practitioner* OR provider*)) OR detailer* OR ((local OR non-graduate OR private OR non-registered) NEAR/0 (health* OR medical) NEAR/2 (practitioner* OR provider*)) OR (Drug NEAR/0 (seller* OR vendor* OR wholesaler*)) OR Shopkeeper* OR "shop keeper*" OR Hakeem* OR ((alternative OR faith OR folk OR natural OR spiritual OR traditional) NEAR/2 Healer*) OR ((barefoot OR Village) NEAR/0 (aide* OR doctor* OR "health worker*" OR volunteer*)) OR "Individual practitioner*" OR (lay NEAR/0 (practitioner* OR provider* OR worker*)) OR "non physician*" OR nonphysician* OR ("complementary and alternative" NEAR/2 (practitioner* OR provider*)) OR herbalist* OR "birth* attendant*" OR ("community health" NEAR/0 (aide* OR educator* OR worker*)) OR "community based practitioner*" OR (indigenous NEAR/0 (healer* OR provider* OR practitioner*)) OR "non-state actor*" OR (ayurved* NEAR/2 (sector* OR worker*))) OR TI=(((alternative OR folk OR traditional) NEAR/0 medicine) OR healer*))

AND

TS=("anti bacterial*" OR antibacterial* OR antibiotic* OR "anti infecti*" OR antiinfecti* OR "anti microbial*" OR antimicrobial*)

Editions: WOS.SCI,WOS.ISTP,WOS.BSCI,WOS.ESCI

Date Run: Tue Jun 11 2024 16:50:15 GMT-0400 (Eastern Daylight Time)

Results: 1613

## Global Health and Global Health Archive (Ovid)

| Global Health <1973 to 2024 Week 22> and Global Health Archive <1910 to 1972> | | |
| --- | --- | --- |
| 1 | community health workers/ or medical auxiliaries/ or traditional birth attendants/ or traditional healers/ or (Informal* or Semi-qualified or semiqualified or un-qualified or unqualified or un-trained or Untrained or Non-formal* or "Less than fully qualified" or ((Alternative or folk or traditional) adj2 (practitioner* or provider* or therapist* or worker*)) or Patent medicine vendor* or quack* or Compounder* or (Rural adj3 (practitioner* or provider*)) or detailer* or ((local or non-graduate or private or non-registered) adj (health* or medical) adj2 (practitioner* or provider*)) or (Drug adj (seller* or vendor* or wholesaler*)) or Shopkeeper* or "shop keeper*" or Hakeem* or ((alternative or faith or folk or natural or spiritual or traditional) adj2 Healer*) or ((barefoot or Village) adj (aide* or doctor* or health worker* or volunteer*)) or Individual practitioner* or (lay adj (practitioner* or provider* or worker*)) or non physician* or nonphysician* or ("complementary and alternative" adj2 (practitioner* or provider*)) or herbalist* or birth* attendant* or (community health adj (aide* or educator* or worker*)) or community based practitioner* or (indigenous adj (healer* or provider* or practitioner*)) or non-state actor* or (ayurved* adj2 (sector* or worker*))).mp. or (((alternative or folk or traditional) adj medicine) or healer*).ti. | 37033 |
| 2 | exp antibiotics/ | 281079 |
| 3 | (anti bacterial* or antibacterial* or antibiotic* or anti infecti* or antiinfecti* or anti microbial* or antimicrobial*).ti,ab. | 299493 |
| 4 | 2 or 3 | 419190 |
| 5 | 1 and 4 | 1579 |

## CINAHL Plus with Full Text (EBSCOhost)

| **#** | **Query** | **Limiters/Expanders** | **Last Run Via** | **Results** |
| --- | --- | --- | --- | --- |
| S1 | (MH "Community Health Workers") OR (MH "Rural Health Personnel") | Expanders - Apply equivalent subjects Search modes - Boolean/Phrase | Interface - EBSCOhost Research Databases Search Screen - Advanced Search Database - CINAHL Plus with Full Text | 5,524 |
| S2 | (MH "Quackery") | Expanders - Apply equivalent subjects Search modes - Boolean/Phrase | Interface - EBSCOhost Research Databases Search Screen - Advanced Search Database - CINAHL Plus with Full Text | 577 |
| S3 | ((TI Informal* OR AB Informal*) OR (TI Semi-qualified OR AB Semi-qualified) OR (TI semiqualified OR AB semiqualified) OR (TI un-qualified OR AB un-qualified) OR (TI unqualified OR AB unqualified) OR (TI un-trained OR AB un-trained) OR (TI Untrained OR AB Untrained) OR (TI Non-formal* OR AB Non-formal*) OR (TI "Less than fully qualified" OR AB "Less than fully qualified") OR (((TI Alternative OR AB Alternative) OR (TI folk OR AB folk) OR (TI traditional OR AB traditional)) N2 ((TI practitioner* OR AB practitioner*) OR (TI provider* OR AB provider*) OR (TI therapist* OR AB therapist*) OR (TI worker* OR AB worker*))) OR (TI "Patent medicine vendor*" OR AB "Patent medicine vendor*") OR (TI quack* OR AB quack*) OR (TI Compounder* OR AB Compounder*) OR ((TI Rural OR AB Rural) N3 ((TI practitioner* OR AB practitioner*) OR (TI provider* OR AB provider*))) OR (TI detailer* OR AB detailer*) OR (((TI local OR AB local) OR (TI non-graduate OR AB non-graduate) OR (TI private OR AB private) OR (TI non-registered OR AB non-registered)) W1 ((TI health* OR AB health*) OR (TI medical OR AB medical)) N2 ((TI practitioner* OR AB practitioner*) OR (TI provider* OR AB provider*))) OR ((TI Drug OR AB Drug) W1 ((TI seller* OR AB seller*) OR (TI vendor* OR AB vendor*) OR (TI wholesaler* OR AB wholesaler*))) OR (TI Shopkeeper* OR AB Shopkeeper*) OR (TI "shop keeper*" OR AB "shop keeper*") OR (TI Hakeem* OR AB Hakeem*) OR (((TI alternative OR AB alternative) OR (TI faith OR AB faith) OR (TI folk OR AB folk) OR (TI natural OR AB natural) OR (TI spiritual OR AB spiritual) OR (TI traditional OR AB traditional)) N2 (TI Healer* OR AB Healer*)) OR (((TI barefoot OR AB barefoot) OR (TI Village OR AB Village)) W1 ((TI aide* OR AB aide*) OR (TI doctor* OR AB doctor*) OR (TI "health worker*" OR AB "health worker*") OR (TI volunteer* OR AB volunteer*))) OR (TI "Individual practitioner*" OR AB "Individual practitioner*") OR ((TI lay OR AB lay) W1 ((TI practitioner* OR AB practitioner*) OR (TI provider* OR AB provider*) OR (TI worker* OR AB worker*))) OR (TI "non physician*" OR AB "non physician*") OR (TI nonphysician* OR AB nonphysician*) OR ((TI "complementary and alternative" OR AB "complementary and alternative") N2 ((TI practitioner* OR AB practitioner*) OR (TI provider* OR AB provider*))) OR (TI herbalist* OR AB herbalist*) OR (TI "birth* attendant*" OR AB "birth* attendant*") OR ((TI "community health" OR AB "community health") W1 ((TI aide* OR AB aide*) OR (TI educator* OR AB educator*) OR (TI worker* OR AB worker*))) OR (TI "community based practitioner*" OR AB "community based practitioner*") OR ((TI indigenous OR AB indigenous) W1 ((TI healer* OR AB healer*) OR (TI provider* OR AB provider*) OR (TI practitioner* OR AB practitioner*))) OR (TI "non-state actor*" OR AB "non-state actor*") OR ((TI ayurved* OR AB ayurved*) N2 ((TI sector* OR AB sector*) OR (TI worker* OR AB worker*)))) OR (((TI alternative OR TI folk OR TI traditional) W1 TI medicine) OR TI healer*) | Expanders - Apply equivalent subjects Search modes - Boolean/Phrase | Interface - EBSCOhost Research Databases Search Screen - Advanced Search Database - CINAHL Plus with Full Text | 36,859 |
| S4 | S1 OR S2 OR S3 | Expanders - Apply equivalent subjects Search modes - Boolean/Phrase | Interface - EBSCOhost Research Databases Search Screen - Advanced Search Database - CINAHL Plus with Full Text | 40,266 |
| S5 | (MH "Antiinfective Agents") OR (MH "Antibiotics+") OR (MM "Antitubercular Agents") OR (MH "Leprostatic Agents+") | Expanders - Apply equivalent subjects Search modes - Boolean/Phrase | Interface - EBSCOhost Research Databases Search Screen - Advanced Search Database - CINAHL Plus with Full Text | 105,756 |
| S6 | ((TI "anti bacterial*" OR AB "anti bacterial*") OR (TI antibacterial* OR AB antibacterial*) OR (TI antibiotic* OR AB antibiotic*) OR (TI "anti infecti*" OR AB "anti infecti*") OR (TI antiinfecti* OR AB antiinfecti*) OR (TI "anti microbial*" OR AB "anti microbial*") OR (TI antimicrobial* OR AB antimicrobial*)) | Expanders - Apply equivalent subjects Search modes - Boolean/Phrase | Interface - EBSCOhost Research Databases Search Screen - Advanced Search Database - CINAHL Plus with Full Text | 85,142 |
| S7 | S5 OR S6 | Expanders - Apply equivalent subjects Search modes - Boolean/Phrase | Interface - EBSCOhost Research Databases Search Screen - Advanced Search Database - CINAHL Plus with Full Text | 147,785 |
| S8 | S4 AND S7 | Expanders - Apply equivalent subjects Search modes - Boolean/Phrase | Interface - EBSCOhost Research Databases Search Screen - Advanced Search Database - CINAHL Plus with Full Text | 346 |

## LILACS, IMSEAR (Global Index Medicus)

(TW:(Informal* OR Semi-qualified OR semiqualified OR un-qualified OR unqualified OR un-trained OR Untrained OR Non-formal* OR "Less than fully qualified" OR ((Alternative OR folk OR traditional) AND (practitioner* OR provider* OR therapist* OR worker*)) OR "Patent medicine vendor*" OR quack* OR Compounder* OR (Rural AND (practitioner* OR provider*)) OR detailer* OR ((local OR non-graduate OR private OR non-registered) AND (health* OR medical) AND (practitioner* OR provider*)) OR (Drug AND (seller* OR vendor* OR wholesaler*)) OR Shopkeeper* OR "shop keeper*" OR Hakeem* OR ((alternative OR faith OR folk OR natural OR spiritual OR traditional) AND Healer*) OR ((barefoot OR Village) AND (aide* OR doctor* OR "health worker*" OR volunteer*)) OR "Individual practitioner*" OR (lay AND (practitioner* OR provider* OR worker*)) OR "non physician*" OR nonphysician* OR ("complementary and alternative" AND (practitioner* OR provider*)) OR herbalist* OR "birth* attendant*" OR ("community health" AND (aide* OR educator* OR worker*)) OR "community based practitioner*" OR (indigenous AND (healer* OR provider* OR practitioner*)) OR "non-state actor*" OR (ayurved* AND (sector* OR worker*))) OR TI:(((alternative OR folk OR traditional) AND medicine) OR healer*))

AND

TW:("anti bacterial*" OR antibacterial* OR antibiotic* OR "anti infecti*" OR antiinfecti* OR "anti microbial*" OR antimicrobial*)

198 records in LILACS

98 records in IMSEAR

## Africa-Wide Information (EBSCOhost)

| **#** | **Query** | **Limiters/Expanders** | **Last Run Via** | **Results** |
| --- | --- | --- | --- | --- |
| S1 | ((TI Informal* OR AB Informal*) OR (TI Semi-qualified OR AB Semi-qualified) OR (TI semiqualified OR AB semiqualified) OR (TI un-qualified OR AB un-qualified) OR (TI unqualified OR AB unqualified) OR (TI un-trained OR AB un-trained) OR (TI Untrained OR AB Untrained) OR (TI Non-formal* OR AB Non-formal*) OR (TI "Less than fully qualified" OR AB "Less than fully qualified") OR (((TI Alternative OR AB Alternative) OR (TI folk OR AB folk) OR (TI traditional OR AB traditional)) N2 ((TI practitioner* OR AB practitioner*) OR (TI provider* OR AB provider*) OR (TI therapist* OR AB therapist*) OR (TI worker* OR AB worker*))) OR (TI "Patent medicine vendor*" OR AB "Patent medicine vendor*") OR (TI quack* OR AB quack*) OR (TI Compounder* OR AB Compounder*) OR ((TI Rural OR AB Rural) N3 ((TI practitioner* OR AB practitioner*) OR (TI provider* OR AB provider*))) OR (TI detailer* OR AB detailer*) OR (((TI local OR AB local) OR (TI non-graduate OR AB non-graduate) OR (TI private OR AB private) OR (TI non-registered OR AB non-registered)) W1 ((TI health* OR AB health*) OR (TI medical OR AB medical)) N2 ((TI practitioner* OR AB practitioner*) OR (TI provider* OR AB provider*))) OR ((TI Drug OR AB Drug) W1 ((TI seller* OR AB seller*) OR (TI vendor* OR AB vendor*) OR (TI wholesaler* OR AB wholesaler*))) OR (TI Shopkeeper* OR AB Shopkeeper*) OR (TI "shop keeper*" OR AB "shop keeper*") OR (TI Hakeem* OR AB Hakeem*) OR (((TI alternative OR AB alternative) OR (TI faith OR AB faith) OR (TI folk OR AB folk) OR (TI natural OR AB natural) OR (TI spiritual OR AB spiritual) OR (TI traditional OR AB traditional)) N2 (TI Healer* OR AB Healer*)) OR (((TI barefoot OR AB barefoot) OR (TI Village OR AB Village)) W1 ((TI aide* OR AB aide*) OR (TI doctor* OR AB doctor*) OR (TI "health worker*" OR AB "health worker*") OR (TI volunteer* OR AB volunteer*))) OR (TI "Individual practitioner*" OR AB "Individual practitioner*") OR ((TI lay OR AB lay) W1 ((TI practitioner* OR AB practitioner*) OR (TI provider* OR AB provider*) OR (TI worker* OR AB worker*))) OR (TI "non physician*" OR AB "non physician*") OR (TI nonphysician* OR AB nonphysician*) OR ((TI "complementary and alternative" OR AB "complementary and alternative") N2 ((TI practitioner* OR AB practitioner*) OR (TI provider* OR AB provider*))) OR (TI herbalist* OR AB herbalist*) OR (TI "birth* attendant*" OR AB "birth* attendant*") OR ((TI "community health" OR AB "community health") W1 ((TI aide* OR AB aide*) OR (TI educator* OR AB educator*) OR (TI worker* OR AB worker*))) OR (TI "community based practitioner*" OR AB "community based practitioner*") OR ((TI indigenous OR AB indigenous) W1 ((TI healer* OR AB healer*) OR (TI provider* OR AB provider*) OR (TI practitioner* OR AB practitioner*))) OR (TI "non-state actor*" OR AB "non-state actor*") OR ((TI ayurved* OR AB ayurved*) N2 ((TI sector* OR AB sector*) OR (TI worker* OR AB worker*)))) OR (((TI alternative OR TI folk OR TI traditional) W1 TI medicine) OR TI healer*) | Expanders - Apply related words; Apply equivalent subjects Search modes - Boolean/Phrase | Interface - EBSCOhost Research Databases Search Screen - Advanced Search Database - Africa-Wide Information | 23,377 |
| S2 | ((TI "anti bacterial*" OR AB "anti bacterial*") OR (TI antibacterial* OR AB antibacterial*) OR (TI antibiotic* OR AB antibiotic*) OR (TI "anti infecti*" OR AB "anti infecti*") OR (TI antiinfecti* OR AB antiinfecti*) OR (TI "anti microbial*" OR AB "anti microbial*") OR (TI antimicrobial* OR AB antimicrobial*)) | Expanders - Apply related words; Apply equivalent subjects Search modes - Boolean/Phrase | Interface - EBSCOhost Research Databases Search Screen - Advanced Search Database - Africa-Wide Information | 43,565 |
| S3 | S1 AND S2 | Limiters - Data Contributor: .....African Journals Online Expanders - Apply related words; Apply equivalent subjects Search modes - Boolean/Phrase | Interface - EBSCOhost Research Databases Search Screen - Advanced Search Database - Africa-Wide Information | 77 |
